# Supplementary material for: Lung type II alveolar epithelial cells collaborate with CCR2+ inflammatory monocytes in host defense against poxvirus infection
Source: Research Square preprint supplement (doi:10.21203/rs.3.rs-109678/v1), 2020-12-02
Supplement: Supplementary file 1 [file 7f6ed037a80c38be2521e25d.pdf]

## Supplementary Information

### **Lung type II alveolar epithelial cells collaborate with CCR2<sup>+</sup> inflammatory monocytes in host defense against poxvirus infection**

Ning Yang<sup>1\*</sup>, Joseph M. Luna<sup>2</sup>, Peihong Dai<sup>1</sup>, Yi Wang<sup>1</sup>, Charles M. Rice<sup>2</sup>, and Liang Deng<sup>1,2,3\*#</sup>

<sup>1</sup>Dermatology Service, Department of Medicine, Memorial Sloan Kettering Cancer Center, New York, New York, USA.

<sup>2</sup>The Laboratory of Virology and Infectious Disease, The Rockefeller University, New York, NY, United States.

<sup>3</sup>Weill Cornell Medical College, New York, New York, USA.

\*Corresponding authors. #Lead contact.

This file contains:

- Supplementary Fig. 1
- Supplementary Fig. 2
- Supplementary Fig. 3
- Supplementary Fig. 4
- Supplementary Fig. 5
- Supplementary Table 1

**Figure S1.**

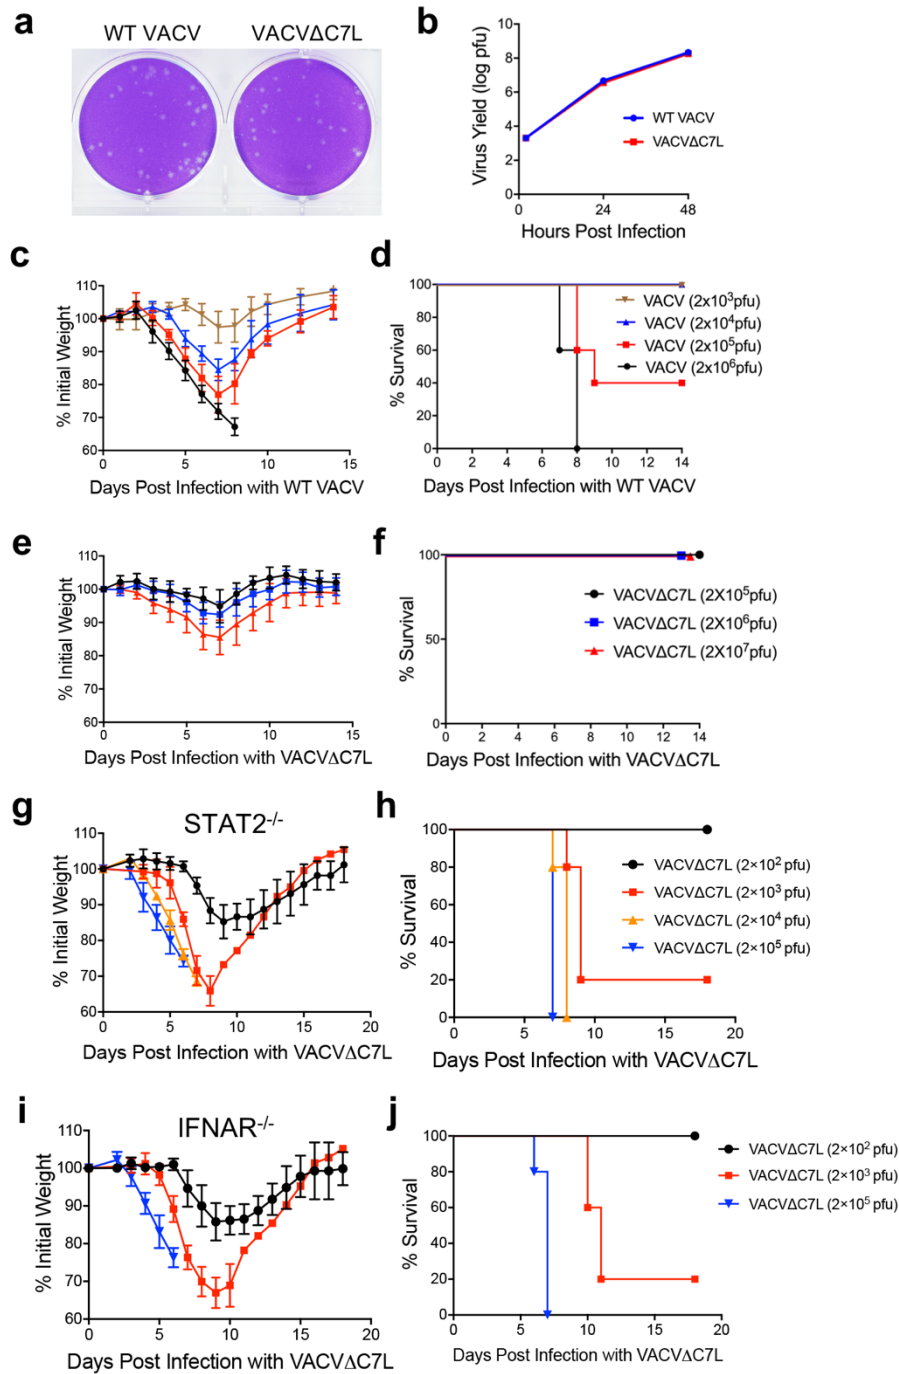

**Supplementary Fig. 1 Determination of LD50 of WT VACV or VACVΔC7L intranasal infection in WT, STAT2<sup>-/-</sup> or IFNAR<sup>-/-</sup> mice.** **a** Plaque sizes of WT VACV and VACVΔC7L at day 2 post-infection in BSC40 cells. **b** Viral growth curve in BSC40 cells at an initial MOI of 0.05. **c-d** Percentages of initial weight (**c**) and Kaplan-Meier survival curve (**d**) of WT C57BL/6J control mice (n=5 in each group) over days post intranasal infection with WT VACV at different doses. **e-f** Percentages of initial weight (**e**) and Kaplan-Meier survival curve (**f**) of WT C57BL/6J control mice (n=5 in each group) over days post intranasal infection with VACVΔC7L at different doses. **g-j** STAT2<sup>-/-</sup> or IFNAR1<sup>-/-</sup> mice were infected with VACVΔC7L intranasally at different doses. Mice were monitored for weight daily. **g, i** Percentages of initial weight over days in STAT2<sup>-/-</sup> (**g**) or IFNAR1<sup>-/-</sup> mice (**i**) post intranasal infection with VACVΔC7L at increasing doses. **h, j** Kaplan-Meier survival curve of STAT2<sup>-/-</sup> (**h**) or IFNAR1<sup>-/-</sup> mice (**j**) infected with VACVΔC7L at increasing doses (n=5 in each group). Data are representative of two independent experiments.

**Figure S2.**

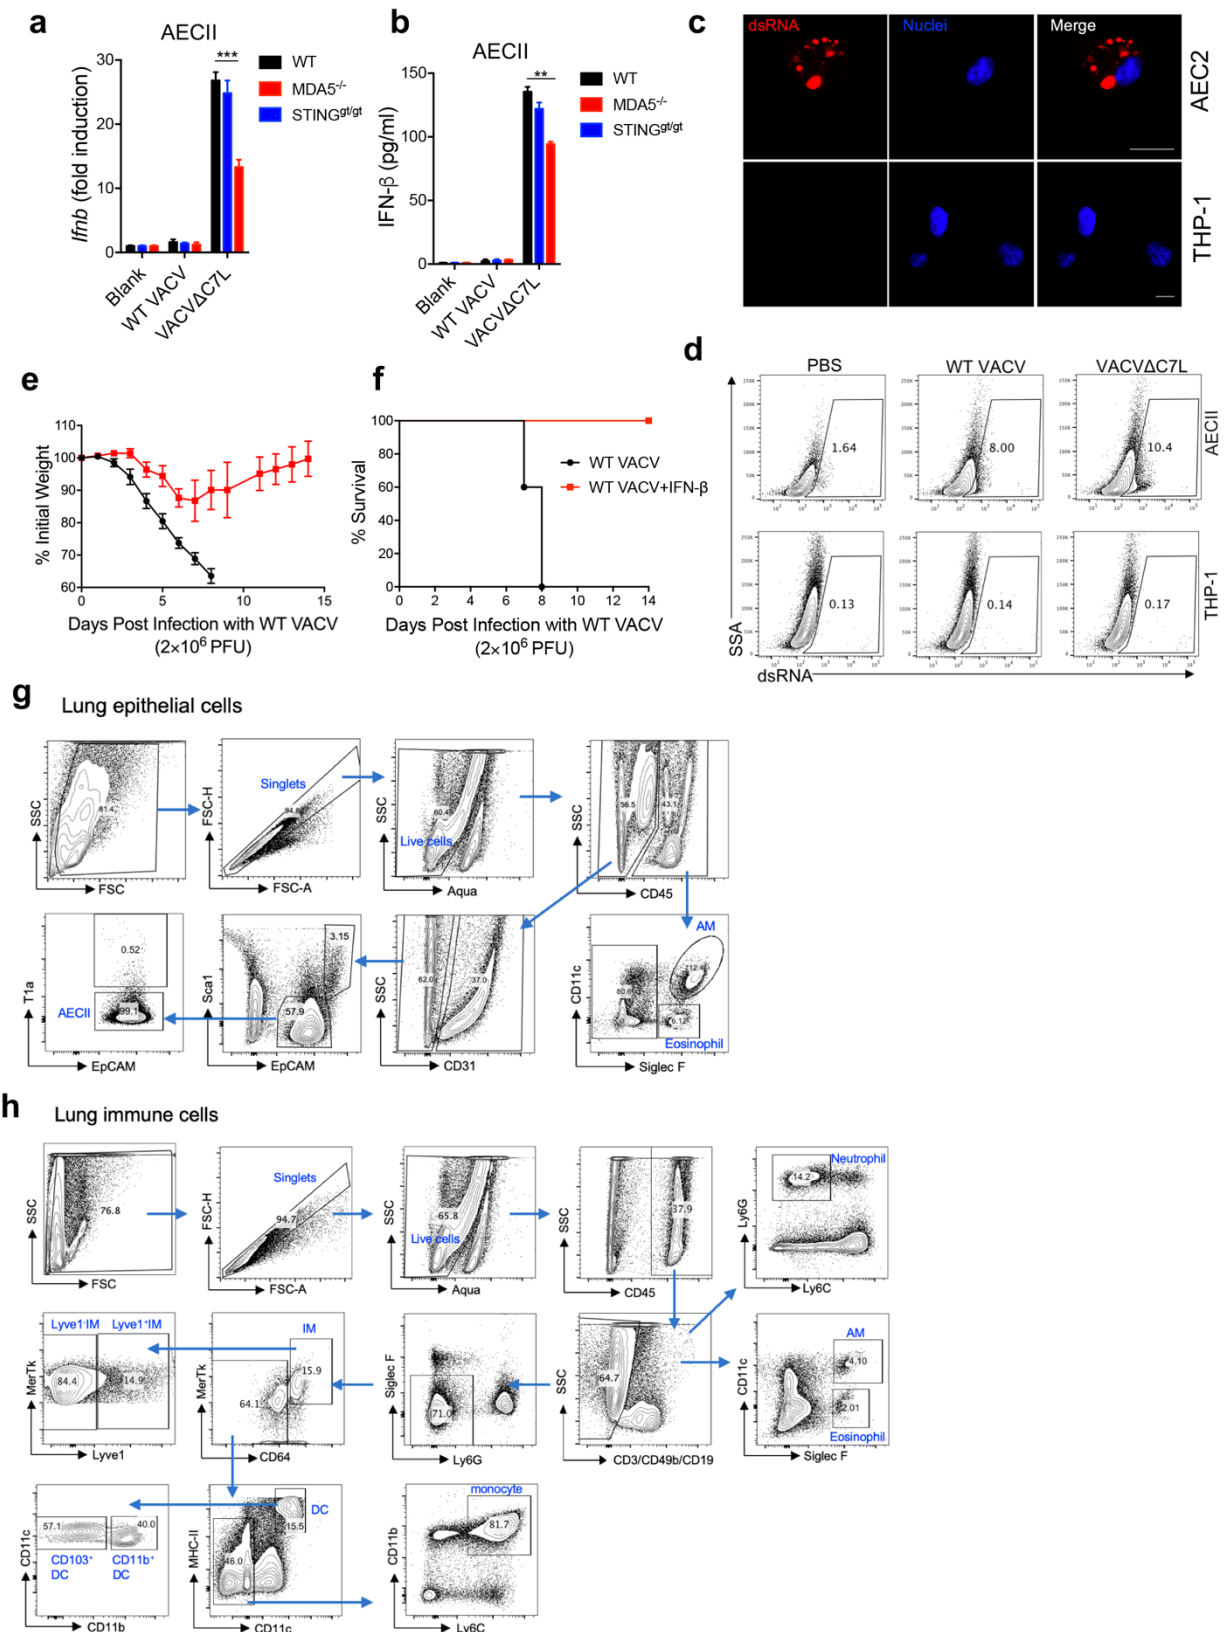

**Supplementary Fig. 2. DsRNA was produced in AECIIs after VACVΔC7L infection and intranasal administration of IFN-β rescues mice from lethal WT VACV infection.**

**a** AECIIs were generated through culturing lineage negative epithelial progenitor cells isolated from WT, STING<sup>Gt/Gt</sup>, or MDA5<sup>-/-</sup> mice as described in Fig. 2. RT-PCR analyses of *Ifnb* gene expression of AECIIs infected with either WT VACV or VACVΔC7L at a MOI of 5 for 12 h. PBS was used as a mock infection control. **b** ELISA analyses of IFN-β levels in the supernatants of AECIIs infected with either WT VACV or VACVΔC7L at a MOI of 5 for 24 h. PBS was used as a mock infection control. **c** Representative confocal images showing dsRNA staining in AECIIs or THP-1 cells infected with VACVΔC7L at a MOI of 5 for 16 h. Scale bar, 10 μm. **d** FACS analysis of dsRNA from AECIIs or THP-1 cells infected with VACVΔC7L at a MOI of 5 for 16 h. **e-f** C57BL/6J mice were infected with WT VACV at 2 x 10<sup>6</sup> pfu. They were either treated with intranasal administration of IFN-β (1 μg/mouse) or PBS at day one post infection, shown are percentages of initial weight (**e**) and Kaplan-Meier survival curve (**f**) over days. (n=5 in each group). \*\* p<0.01, and \*\*\* p<0.001 (unpaired t test). Data are representative of two independent experiments and represented as mean ± SD. **g-h** Gating strategy to define epithelial cells and myeloid cell populations in the lung. Within the single cell suspension, doublets and dead cells were excluded from analysis. **g** Among CD45<sup>+</sup> cells, CD31<sup>+</sup> cells represent endothelial cells. Among CD31<sup>-</sup> cells, after excluding bronchioalveolar stem cells (BASCs), EpCAM<sup>+</sup>Sca1<sup>-</sup> cells represent lung epithelial cells and AECIIs are further defined as EpCAM<sup>+</sup>T1a<sup>-</sup>. **h** Among CD45<sup>+</sup> cells, Siglec F<sup>+</sup> CD11c<sup>+</sup> cells represent alveolar macrophages (AMs). Siglec F<sup>+</sup> CD11c<sup>-</sup> cells represent eosinophils. Neutrophils are defined as Ly6G<sup>+</sup> Ly6C<sup>-</sup> cells. After excluding Siglec F<sup>+</sup>, Ly6G<sup>+</sup>, CD3<sup>+</sup>, CD49b<sup>+</sup>, CD19<sup>+</sup> cells, CD64<sup>+</sup> MerTk<sup>+</sup> cells represent interstitial macrophages (IMs), which can be further divided into Lyve1<sup>+</sup> IMs and Lyve1<sup>-</sup> IMs. Among CD64<sup>-</sup>MerTk<sup>-</sup> cells, DCs are defined as MHC-II<sup>+</sup> CD11c<sup>+</sup> cells. Monocytes are defined as Ly6C<sup>+</sup> CD11b<sup>+</sup> cells.

**Figure S3.**

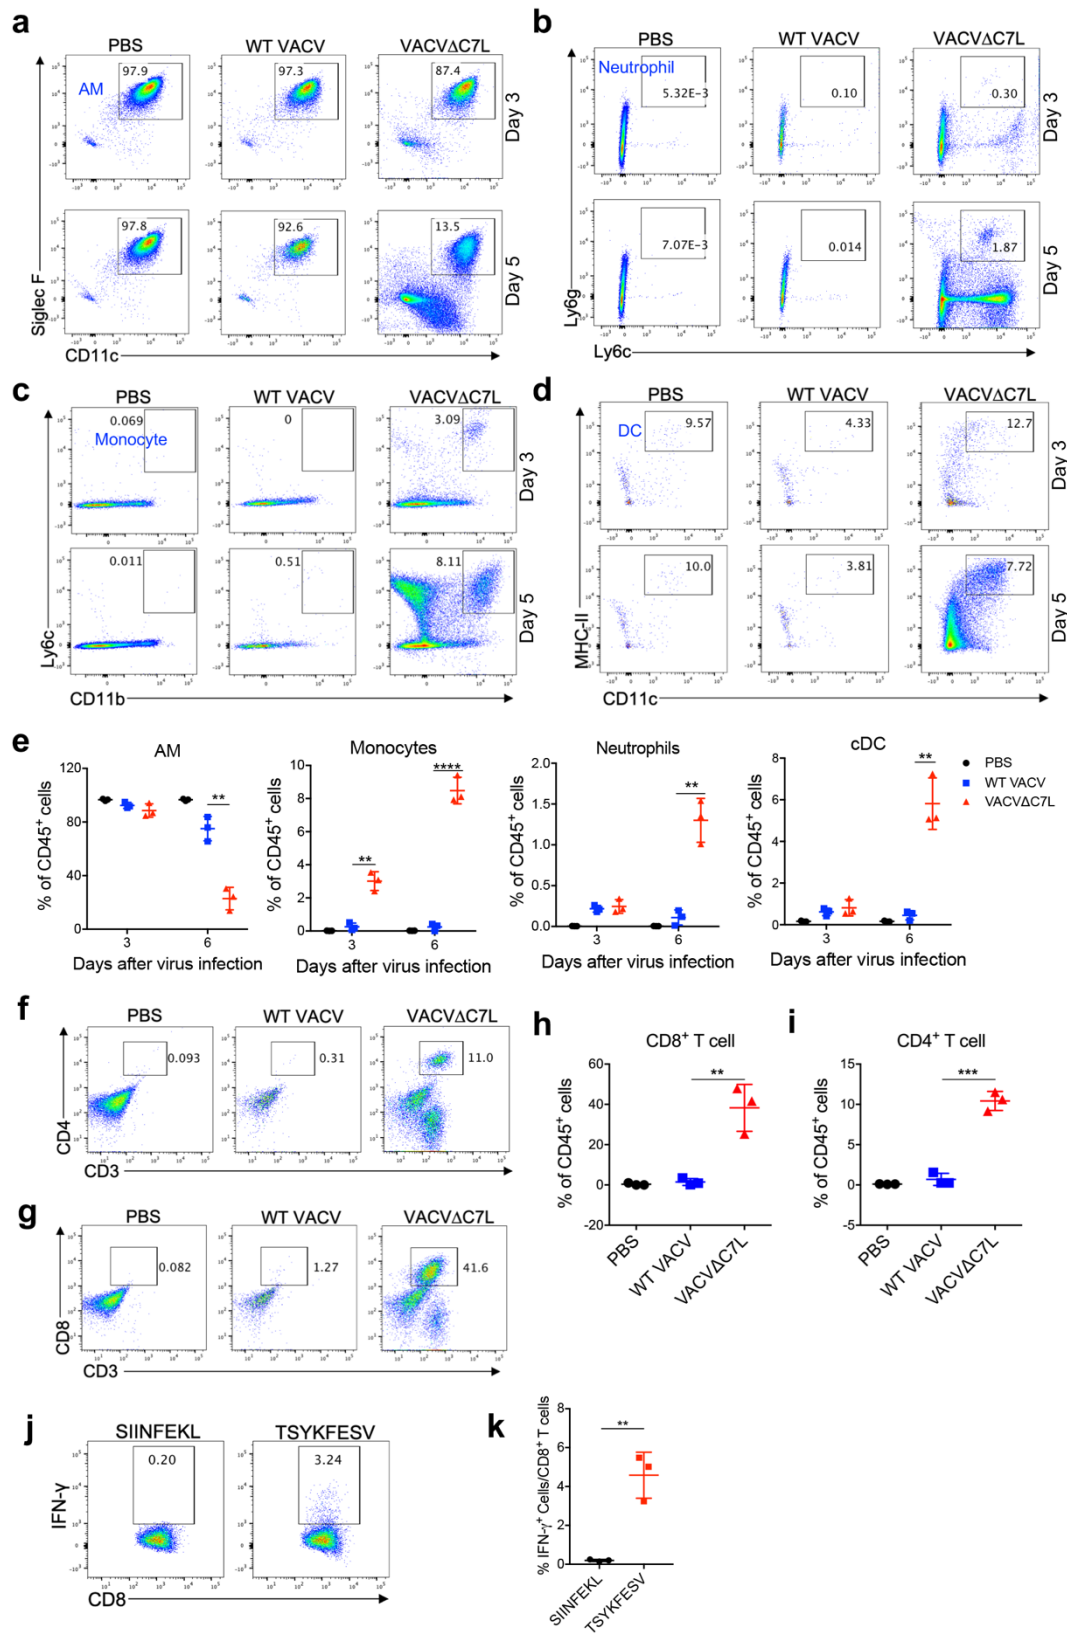

**Supplementary Fig. 3 Intranasal infection of VACV $\Delta$ C7L results in the influx of dendritic cells (DCs), monocytes, neutrophils, CD8<sup>+</sup>, and CD4<sup>+</sup> T cells into bronchoalveolar space of the infected lungs.** WT C57BL/6J mice were infected with either WT VACV at  $2 \times 10^5$  pfu or with VACV $\Delta$ C7L at  $2 \times 10^7$  pfu, or mock-infected with PBS. BAL was collected at day 3 and day 5 post infection or PBS treatment. Myeloid cell populations in the BAL were analyzed by FACS. **a** Dot plots of Siglec F<sup>+</sup>CD11c<sup>+</sup> lung alveolar macrophages in the BAL from mice infected with either WT VACV, VACV $\Delta$ C7L, or mock infected. **b** Dot plots of Ly6G<sup>+</sup>Ly6C<sup>+</sup> neutrophils in the BAL from mice infected with either WT VACV, VACV $\Delta$ C7L, or mock infected. **c** Dot plots of Ly6C<sup>+</sup>CD11b<sup>+</sup> inflammatory monocytes in the BAL from mice infected with either WT VACV, VACV $\Delta$ C7L, or mock infected. **d** Dot plots of MHCII<sup>+</sup>CD11c<sup>+</sup> DCs in the BAL from mice infected with either WT VACV, VACV $\Delta$ C7L, or mock infected. **e** Quantification of data from (**a-d**) with independent experimental replicates. **f-g** Dot plots of CD4<sup>+</sup> or CD8<sup>+</sup> T cells in the BAL from mice at day 5 post infected with either WT VACV, VACV $\Delta$ C7L, or mock infected. **h-i** Quantification of data from (**f-g**) with independent experimental replicates. **J** Dot plots of B8R specific CD8<sup>+</sup> T cells in BAL from mice at day 5 post infected with VACV $\Delta$ C7L. SIINFEKL as non-specific peptide control. **k** Quantification of data from **J**. \*\*  $p < 0.01$ , \*\*\*  $p < 0.01$ , and \*\*\*\*  $p < 0.0001$  (unpaired t test). Data are representative of two (**f-k**) or three (**a-e**) independent experiments.

**Figure S4.**

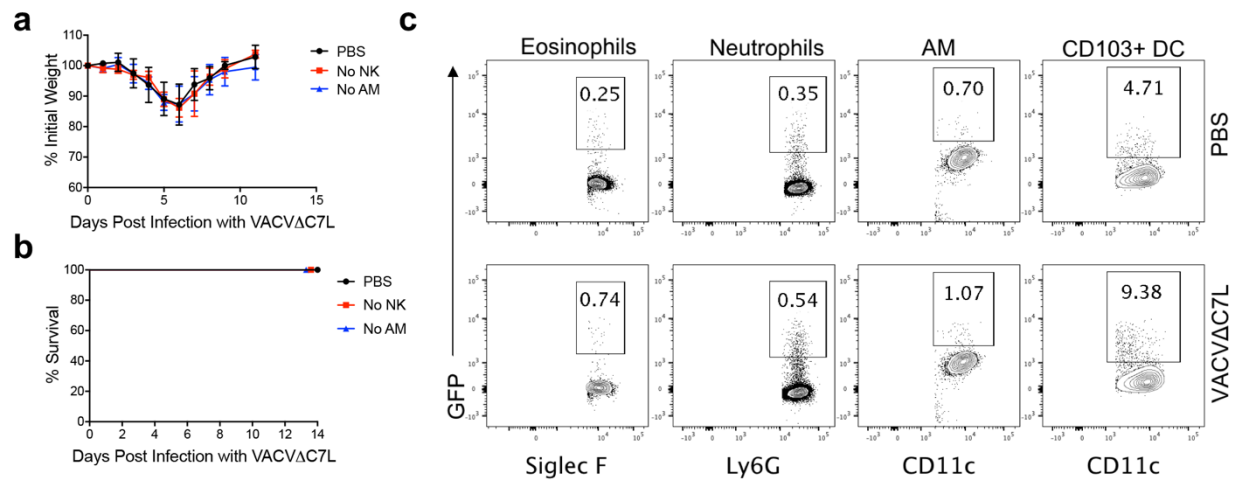

**Supplementary Fig. 4 Alveolar macrophages and NK cells are not required for host defense against VACVΔC7L infection.** **a-b** Percentages of initial weight (**a**) and Kaplan-Meier survival curve (**b**) over days in WT C57BL/6J mice, NK cell depletion mice or AM depletion mice infected with VACVΔC7L at  $2 \times 10^7$  pfu. (n=5 in each group). **c** Dot plots showing GFP<sup>+</sup> eosinophils, GFP<sup>+</sup> neutrophils, and GFP<sup>+</sup> AM and GFP<sup>+</sup> CD103<sup>+</sup> DCs in the lungs of CCR2-GFP mice at day 3 post infection with VACVΔC7L at  $2 \times 10^7$  pfu compared with PBS-mock infected mice. Data are representative of two independent experiments.



Figure S5.

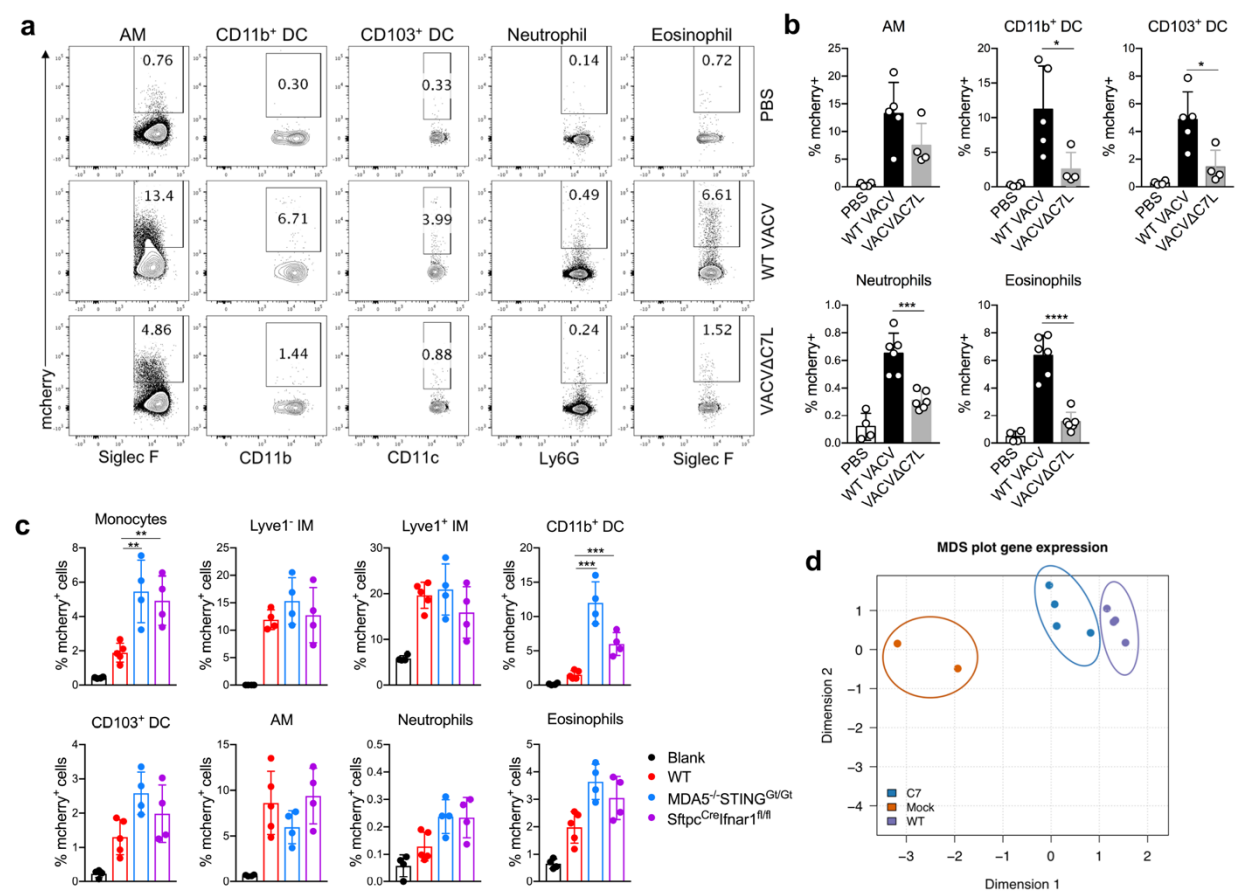

**Supplementary Fig. 5 CCR2<sup>+</sup> inflammatory monocytes and IMs are the main cell populations infected by vaccinia virus. a-b** Representative flow cytometry dot plots (**a**) and bar graph (**b**) showing mcherry<sup>+</sup> of different cell populations in the lungs of C57BL/6J mice at day 3 post infection with WT VACV-mcherry, VACVΔC7L-mcherry at 2 x 10<sup>7</sup> pfu or PBS-mock infected mice. **c** bar graph showing mcherry<sup>+</sup> of different cell populations in the lungs of C57BL/6J, MDA5<sup>-/-</sup>STING<sup>Gt/Gt</sup> or Sftpc<sup>cre</sup>Ifnar1<sup>fl/fl</sup> mice at day 3 post infection with VACVΔC7L-mcherry at 2 x 10<sup>7</sup> pfu. PBS-mock infected C57BL/6J mice as blank control. **d** Multidimensional scaling (MDS) plot of RNAseq results in monocytes. \* p<0.05, \*\* p<0.01, \*\*\* p<0.001 and \*\*\*\* p<0.0001 (unpaired t test). Data are representative of two (**a-d**) independent experiments and presented as mean ± SD.

Supplementary Table 1. List of primers used in this paper for qRT-PCR.

| Primer sequence                                | SOURCE                          |
|------------------------------------------------|---------------------------------|
| qPCR <i>Ifnb</i> For: TGGAGATGACGGAGAAGATG     | Integrated DNA technologies IDT |
| qPCR <i>Ifnb</i> Rev: TTGGATGGCAAAGGCAGT       |                                 |
| qPCR <i>Ccl4</i> For: GCCCTCTCTCTCCTCTTGCT     |                                 |
| qPCR <i>Ccl4</i> Rev: CTGGTCTCATAGTAATCCATC    |                                 |
| qPCR <i>Gapdh</i> For: AGGTCGGTGTGAACGGATTTG   |                                 |
| qPCR <i>Gapdh</i> Rev: TGTAGACCATGTAGTTGAGGTCA |                                 |
| qPCR <i>Ccl5</i> For: GCCCACGTCAAGGAGTATTTCTA  |                                 |
| qPCR <i>Ccl5</i> Rev: ACACACTTGGCGGTTCTTC      |                                 |
| qPCR <i>E5</i> For: TCTCGGACATTTTCAGCCATC      |                                 |
| qPCR <i>E5</i> Rev: GGAAACATGTAAAGCAGCAGAG     |                                 |
| qPCR <i>A34</i> For: GGCATAGGAACATTTCTGCATTAC  |                                 |
| qPCR <i>A34</i> Rev: TACGACACTGATAAACCGCATT    |                                 |
| qPCR <i>A27</i> For: CCGTCCAGTCTGAACATCAAT     |                                 |
| qPCR <i>A27</i> Rev: GTGTTGTAAACGCAACGATGAA    |                                 |
